# Supplementary material for: Substrate-Dependent Inhibition of the Human Organic Cation Transporter OCT2: A Comparison of Metformin with Experimental Substrates
Source: PubMed Central journal article supplement (PMC4556614; doi:10.1371/journal.pone.0136451), 2015-09-01
Supplement: pone.0136451.s003.pdf [file pone.0136451.s003.pdf]

**Table S1**

| Drug            | ATC code                  | CAS number  | % Inhibition of OCT2-dependent MF uptake |                                 | % Inhibition of OCT2-dependent MPP <sup>+</sup> uptake |                                 |
|-----------------|---------------------------|-------------|------------------------------------------|---------------------------------|--------------------------------------------------------|---------------------------------|
|                 |                           |             | at 20 $\mu$ M (mean $\pm$ SEM)           | at 200 $\mu$ M (mean $\pm$ SEM) | at 20 $\mu$ M (mean $\pm$ SEM)                         | At 200 $\mu$ M (mean $\pm$ SEM) |
| Acamprosate     | N07BB03                   | 77337-73-6  | 2.7 $\pm$ 4.8                            | 0.9 $\pm$ 5.8                   | -8.1 $\pm$ 4.4                                         | -7.7 $\pm$ 5.2                  |
| Acetylcysteine  | R05CB01, V03AB23, S01XA08 | 616-91-1    | 13.2 $\pm$ 6.3                           | 11.0 $\pm$ 9.4                  | -35.6 $\pm$ 7.7                                        | -36.0 $\pm$ 3.2                 |
| Agomelatine     | N06AX22                   | 138112-76-2 | 71.3 $\pm$ 2.6                           | 95.5 $\pm$ 1.8                  | -10.3 $\pm$ 2.7                                        | 39.9 $\pm$ 3.5                  |
| Alendronate     | M05BA04                   | 66376-36-1  | 30.7 $\pm$ 9.0                           | 75.6 $\pm$ 0.5                  | 5.4 $\pm$ 3.9                                          | 10.5 $\pm$ 2.0                  |
| Allopurinol     | M04AA01                   | 315-30-0    | 24.8 $\pm$ 6.9                           | 26.8 $\pm$ 3.9                  | 35.6 $\pm$ 7.5                                         | 52.7 $\pm$ 8.8                  |
| Alprazolam      | N05BA12                   | 28981-97-7  | 43.0 $\pm$ 5.0                           | 88.3 $\pm$ 3.6                  | 14.3 $\pm$ 7.4                                         | 78.5 $\pm$ 3.6                  |
| Amisulpride     | N05AL05                   | 71675-85-9  | 52.0 $\pm$ 2.1                           | 91.7 $\pm$ 0.7                  | 25.5 $\pm$ 7.0                                         | 51.3 $\pm$ 6.7                  |
| Amitriptyline   | N06AA09                   | 549-18-8    | 95.4 $\pm$ 4.8                           | 101.7 $\pm$ 2.2                 | 58.4 $\pm$ 2.8                                         | 97.8 $\pm$ 0.6                  |
| Amlodipine      | C08CA01                   | 88150-42-9  | 21.9 $\pm$ 9.0                           | 110.0 $\pm$ 17.3                | -13.8 $\pm$ 7.4                                        | 39.3 $\pm$ 6.8                  |
| Amoxicillin     | J01CA04                   | 26787-78-0  | 3.2 $\pm$ 6.6                            | 4.5 $\pm$ 5.1                   | -21.0 $\pm$ 11.1                                       | -13.5 $\pm$ 14.5                |
| Aripiprazole    | N05AX12                   | 129722-12-9 | 53.4 $\pm$ 9.1                           | 82.0 $\pm$ 6.7                  | 6.7 $\pm$ 3.6                                          | 16.9 $\pm$ 5.2                  |
| ASA             | N02BA01, B01AC06, A01AD05 | 50-78-2     | -18.7 $\pm$ 11.0                         | 1.3 $\pm$ 8.9                   | -10.6 $\pm$ 5.7                                        | -1.5 $\pm$ 4.5                  |
| Atenolol        | C07AB03                   | 29122-68-7  | 28.0 $\pm$ 2.4                           | 41.1 $\pm$ 5.1                  | -14.9 $\pm$ 3.5                                        | -3.2 $\pm$ 9.7                  |
| Benperidol      | N05AD07                   | 2062-84-2   | 58.7 $\pm$ 3.3                           | 72.2 $\pm$ 2.7                  | -21.5 $\pm$ 2.8                                        | 1.6 $\pm$ 8.3                   |
| Bisoprolol      | C07AB07                   | 66722-44-9  | 57.2 $\pm$ 4.0                           | 75.8 $\pm$ 4.5                  | -16.1 $\pm$ 2.2                                        | 11.8 $\pm$ 5.5                  |
| Bromazepam      | N05BA08                   | 1812-30-2   | 27.6 $\pm$ 2.6                           | 77.9 $\pm$ 1.4                  | -16.3 $\pm$ 9.0                                        | 14.7 $\pm$ 8.3                  |
| Candesartan     | C09CA06                   | 139481-59-7 | 48.0 $\pm$ 3.7                           | 69.7 $\pm$ 2.7                  | 0.9 $\pm$ 0.1                                          | -2.4 $\pm$ 4.0                  |
| Captopril       | C09AA01                   | 62571-86-2  | -21.6 $\pm$ 19.5                         | -59.0 $\pm$ 0.9                 | 3.8 $\pm$ 5.7                                          | 10.2 $\pm$ 6.8                  |
| Carbamazepine   | N03AF01                   | 298-46-4    | 0.2 $\pm$ 3.8                            | 83.8 $\pm$ 1.2                  | -51.4 $\pm$ 9.2                                        | -2.1 $\pm$ 4.4                  |
| Carvedilol      | C07AG02                   | 72956-09-3  | 84.3 $\pm$ 5.2                           | 98.6 $\pm$ 0.5                  | 32.2 $\pm$ 3.7                                         | 88.5 $\pm$ 1.5                  |
| Cefuroxime      | J01DC02                   | 55268-75-2  | 29.9 $\pm$ 9.7                           | 50.3 $\pm$ 11.6                 | -10.5 $\pm$ 7.0                                        | -30.8 $\pm$ 12.9                |
| Chlorprothixene | N05AF03                   | 6469-93-8   | 66.8 $\pm$ 7.9                           | 98.4 $\pm$ 0.9                  | 29.9 $\pm$ 7.5                                         | 91.7 $\pm$ 2.2                  |

|                  |                                             |             |             |             |              |               |
|------------------|---------------------------------------------|-------------|-------------|-------------|--------------|---------------|
| Cholecalciferol  | A11CC05                                     | 67-97-0     | 2.8 ± 15.7  | 17.1 ± 5.0  | 6.8 ± 5.1    | 10.4 ± 6.1    |
| Citalopram       | N06AB04                                     | 59729-32-7  | 66.6 ± 7.9  | 78.9 ± 8.4  | 40.0 ± 9.9   | 75.2 ± 9.7    |
| Clomethiazole    | N05CM02                                     | 6001-74-7   | -9.2 ± 6.8  | 28.7 ± 3.9  | -6.7 ± 9.2   | -147.3 ± 23.7 |
| Clomipramine     | N06AA04                                     | 17321-77-6  | 91.5 ± 4.9  | 99.5 ± 3.7  | 90.3 ± 1.5   | 98.8 ± 3.0    |
| Clopidogrel      | B01AC04                                     | 120202-66-6 | 70.0 ± 2.0  | 92.8 ± 5.4  | 12.5 ± 0.8   | 41.5 ± 4.0    |
| Clozapine        | N05AH02                                     | 5786-21-0   | 71.4 ± 1.6  | 98.7 ± 0.7  | 43.4 ± 4.7   | 84.1 ± 2.5    |
| Diazepam         | N05BA01                                     | 439-14-5    | 83.3 ± 2.0  | 98.7 ± 0.5  | 32.2 ± 9.2   | 85.6 ± 1.4    |
| Diclofenac       | M01AB05,<br>M02AA15,<br>S01BC03,<br>D11AX18 | 15307-86-5  | 14.3 ± 8.8  | 59.1 ± 6.5  | 8.8 ± 8.9    | 24.0 ± 4.0    |
| Digitoxin        | C01AA04.,<br>C01AA54,<br>C05BZ05            | 71-63-6     | 28.7 ± 7.9  | 32.8 ± 2.9  | -32.6 ± 3.8  | -32.4 ± 8.5   |
| Donepezil        | N06DA02                                     | 884740-09-4 | 92.9 ± 1.2  | 102.5 ± 1.8 | 62.2 ± 8.1   | 99.0 ± 3.4    |
| Doxazosin        | C02CA04                                     | 74191-85-8  | 48.0 ± 5.5  | 92.1 ± 1.0  | 26.7 ± 10.3  | 45.8 ± 14.0   |
| Doxepin          | N06AA12                                     | 1229-29-4   | 98.8 ± 2.1  | 99.3 ± 0.7  | 94.7 ± 3.9   | 107.6 ± 5.1   |
| Doxycycline      | J01AA02,<br>A01AB22                         | 564-25-0    | -21.8 ± 1.9 | 1.9 ± 9.1   | -12.9 ± 13.1 | -16.6 ± 11.7  |
| Drospirenone     | G03AA12,<br>G03FA17                         | 67392-87-4  | 88.0 ± 7.3  | 99.1 ± 0.7  | 0.0 ± 3.6    | 42.6 ± 1.4    |
| Duloxetine       | N06AX21                                     | 136434-34-9 | 76.5 ± 0.9  | 98.3 ± 0.2  | 23.3 ± 6.0   | 86.4 ± 5.1    |
| Enalapril        | C09AA02                                     | 75847-73-3  | 7.5 ± 2.3   | 34.2 ± 4.5  | 7.1 ± 7.4    | 20.2 ± 5.6    |
| Escitalopram     | N06AB10                                     | 128196-01-0 | 62.6 ± 9.2  | 93.8 ± 3.6  | -26.3 ± 7.9  | 26.0 ± 10.1   |
| Estradiol        | G03CA03                                     | 50-28-2     | 57.9 ± 5.4  | 66.6 ± 2.1  | 10.6 ± 4.2   | 19.0 ± 6.5    |
| Ethinylestradiol | G03CA01,<br>L02AA03                         | 57-63-6     | 31.8 ± 8.1  | 62.2 ± 13.1 | 14.0 ± 8.8   | 46.8 ± 6.3    |
| Etoricoxib       | M01AH05                                     | 202409-33-4 | 64.1 ± 6.8  | 99.2 ± 2.7  | 2.3 ± 4.0    | 72.4 ± 2.2    |
| Ezetimibe        | C10AX09                                     | 163222-33-1 | -6.8 ± 9.7  | 0.2 ± 10.0  | -12.6 ± 12.4 | -13.2 ± 11.5  |
| Felodipine       | C08CA02                                     | 72509-76-3  | 4.9 ± 6.1   | 15.9 ± 12.1 | -8.8 ± 12.0  | -16.8 ± 10.8  |
| Fenofibrate      | C10AB05                                     | 49562-28-9  | 43.0 ± 9.9  | 73.4 ± 4.7  | 12.8 ± 5.0   | 32.0 ± 5.7    |
| Flunitrazepam    | N05CD03                                     | 1622-62-4   | 74.1 ± 3.1  | 92.9 ± 0.9  | 5.1 ± 8.4    | 57.5 ± 6.6    |
| Fluoxetine       | N06AB03                                     | 56296-78-7  | 79.0 ± 0.9  | 98.5 ± 1.2  | 20.2 ± 3.5   | 91.8 ± 2.9    |
| Flupentixol      | N05AF01                                     | 51529-01-2  | 75.0 ± 7.9  | 96.1 ± 2.1  | 22.9 ± 7.5   | 107.8 ± 5.0   |
| Fluphenazine     | N05AB02                                     | 146-56-5    | 91.4 ± 0.9  | 99.3 ± 0.4  | 39.3 ± 7.0   | 94.3 ± 3.3    |

|                      |                                             |             |              |              |              |              |
|----------------------|---------------------------------------------|-------------|--------------|--------------|--------------|--------------|
| Fluvastatin          | C10AA04                                     | 93957-54-1  | -21.1 ± 10.3 | 32.5 ± 8.1   | -10.1 ± 6.1  | 5.8 ± 9.1    |
| Furosemide           | C03CA01                                     | 54-31-9     | 31.1 ± 7.1   | 45.8 ± 8.3   | -19.1 ± 7.8  | -30.0 ± 5.8  |
| Gabapentin           | N03AX12                                     | 60142-96-3  | 9.1 ± 8.2    | 37.6 ± 4.2   | -8.4 ± 9.6   | -12.5 ± 9.4  |
| Galantamine          | N06DA04                                     | 1953-04-4   | 51.5 ± 2.8   | 92.5 ± 1.2   | -11.7 ± 9.4  | 12.3 ± 7.0   |
| Glibenclamide        | A10BB01                                     | 10238-21-8  | 38.7 ± 11.9  | 87.9 ± 3.2   | -27.7 ± 5.0  | -31.1 ± 1.7  |
| Glimepiride          | A10BB12                                     | 93479-97-1  | 66.8 ± 2.9   | 65.6 ± 4.6   | 31.1 ± 7.6   | 53.8 ± 15.2  |
| Haloperidol          | N05AD01                                     | 52-86-8     | 6.4 ± 8.9    | 66.9 ± 5.3   | -11.2 ± 5.0  | -10.6 ± 5.1  |
| Hydrochlorothiazide  | C03AA03                                     | 58-93-5     | -34.7 ± 16.9 | -38.6 ± 8.5  | -55.4 ± 10.2 | -36.6 ± 7.4  |
| Ibuprofen            | M02AA13,<br>M01AE01,<br>C01EB16,<br>G02CC01 | 15687-27-1  | 23.4 ± 6.7   | 29.6 ± 4.1   | -5.8 ± 8.0   | -0.3 ± 7.5   |
| Irbesartan           | C09CA04                                     | 138402-11-6 | -16.2 ± 14.4 | -14.2 ± 17.8 | -18.9 ± 12.4 | -50.7 ± 14.1 |
| Isosorbide dinitrate | C01DA08,<br>C01DA58                         | 87-33-2     | -19.5 ± 6.9  | 21.7 ± 4.4   | -20.4 ± 5.0  | -82.4 ± 8.0  |
| Lansoprazole         | A02BC03                                     | 103577-45-3 | 87.7 ± 1.6   | 103.0 ± 2.7  | 22.1 ± 5.3   | 90.1 ± 1.8   |
| Lercanidipine        | C08CA13                                     | 100427-26-7 | 7.8 ± 3.8    | -20.4 ± 11.1 | -13.3 ± 8.6  | -9.3 ± 3.6   |
| Levodopa             | N04BA01                                     | 59-92-7     | -9.3 ± 6.8   | 67.3 ± 2.6   | -24.6 ± 0.5  | 11.8 ± 1.4   |
| Levothyroxine        | H03AA01                                     | 51-48-9     | 0.8 ± 9.6    | 14.3 ± 15.2  | 3.6 ± 4.1    | -3.3 ± 10.3  |
| Lisinopril           | C09AA03                                     | 83915-83-7  | -10.3 ± 12.9 | 2.9 ± 9.0    | 16.0 ± 9.0   | 9.8 ± 11.8   |
| Lithium              | N05AN01                                     | 7447-41-8   | -15.2 ± 7.9  | -14.7 ± 6.8  | -28.4 ± 7.5  | -36.7 ± 9.7  |
| Lorazepam            | N05BA06                                     | 846-49-1    | 32.0 ± 2.2   | 96.5 ± 1.0   | 0.3 ± 5.1    | 17.7 ± 7.3   |
| Lormetazepam         | N05CD06                                     | 848-75-9    | 77.0 ± 0.6   | 92.4 ± 0.5   | 47.8 ± 8.4   | 69.8 ± 5.3   |
| Losartan             | C09CA01                                     | 114798-26-4 | -9.3 ± 10.4  | 7.4 ± 8.2    | -41.8 ± 8.1  | -59.5 ± 6.1  |
| Melperone            | N05AD03                                     | 1622-79-3   | 75.0 ± 3.4   | 94.9 ± 4.2   | 8.6 ± 10.1   | 69.7 ± 3.8   |
| Memantine            | N06DX01                                     | 41100-52-1  | 54.0 ± 2.1   | 93.9 ± 0.6   | 20.6 ± 8.6   | 54.0 ± 7.0   |
| Mesalazine           | A07EC02                                     | 89-57-6     | 21.6 ± 11.1  | 59.8 ± 6.7   | -51.3 ± 6.1  | -68.0 ± 8.5  |
| Metamizole           | N02BB02                                     | 68-89-3     | -4.8 ± 6.4   | 8.4 ± 9.8    | -31.6 ± 6.0  | -39.1 ± 5.1  |
| Metformin            | A10BA02                                     | 657-24-9    |              |              | -17.2 ± 10.1 | -12.9 ± 8.4  |
| Methadone            | N07BC02                                     | 1095-90-5   | 94.6 ± 0.7   | 99.3 ± 0.3   | 8.9 ± 4.4    | 68.7 ± 3.8   |
| Methotrexate         | L01BA01,<br>L04AX03                         | 59-05-2     | -1.1 ± 11.4  | -5.8 ± 13.0  | -19.0 ± 7.2  | -9.5 ± 3.0   |
| Methylphenidate      | N06BA04                                     | 298-59-9    | 17.9 ± 4.6   | 79.6 ± 2.3   | 11.5 ± 8.9   | 31.6 ± 4.7   |

|                |                                                                                                                     |             |              |              |              |              |
|----------------|---------------------------------------------------------------------------------------------------------------------|-------------|--------------|--------------|--------------|--------------|
| Metoclopramide | A03FA01                                                                                                             | 364-62-5    | 74.7 ± 8.5   | 93.9 ± 0.6   | 24.5 ± 2.9   | 66.6 ± 8.4   |
| Metoprolol     | C07AB02                                                                                                             | 37350-58-6  | 50.5 ± 5.9   | 88.2 ± 1.7   | 23.2 ± 6.5   | 27.5 ± 6.9   |
| Mirtazapine    | N06AX11                                                                                                             | 85650-52-8  | 73.3 ± 3.0   | 90.7 ± 3.9   | -4.8 ± 4.0   | 57.6 ± 6.1   |
| Moclobemide    | N06AG02                                                                                                             | 71320-77-9  | 4.3 ± 2.8    | 48.9 ± 2.1   | -38.7 ± 8.5  | -16.1 ± 17.7 |
| Molsidomine    | C01DX12                                                                                                             | 25717-80-0  | 41.4 ± 3.6   | 69.5 ± 1.7   | -1.7 ± 8.3   | 3.8 ± 4.9    |
| Moxonidine     | C02AC05                                                                                                             | 75438-57-2  | 58.1 ± 14.5  | 86.1 ± 2.9   | 16.3 ± 6.5   | 23.1 ± 7.1   |
| Nebivolol      | C07AB12                                                                                                             | 118457-14-0 | 61.4 ± 10.4  | 75.2 ± 10.8  | -13.7 ± 13.3 | 43.2 ± 3.3   |
| Nifedipine     | C08CA05                                                                                                             | 21829-25-4  | 18.8 ± 4.4   | 77.1 ± 8.0   | -8.1 ± 6.1   | -1.4 ± 10.2  |
| Nitrendipine   | C08CA08                                                                                                             | 39562-70-4  | 0.4 ± 9.8    | 53.2 ± 3.7   | 4.0 ± 6.3    | -2.4 ± 5.0   |
| Norethindrone  | G03AC01,<br>G03DC02                                                                                                 | 68-22-4     | 41.0 ± 11.0  | 87.7 ± 6.1   | -29.4 ± 6.4  | 3.0 ± 3.3    |
| Olanzapine     | N05AH03                                                                                                             | 132539-06-1 | -7.5 ± 5.7   | 74.9 ± 1.8   | 83.5 ± 9.4   | 109.7 ± 2.8  |
| Olmesartan     | C09CA08,<br>C09DA08                                                                                                 | 144689-24-7 | -0.1 ± 10.9  | 21.1 ± 7.3   | -23.8 ± 7.1  | -21.9 ± 13.3 |
| Omeprazole     | A02BC01                                                                                                             | 73590-58-6  | 94.9 ± 2.4   | 107.4 ± 4.3  | 56.0 ± 4.0   | 93.0 ± 0.9   |
| Opipramol      | N06AA05                                                                                                             | 909-39-7    | 94.7 ± 1.5   | 99.5 ± 0.7   | 14.0 ± 7.6   | 81.6 ± 3.9   |
| Oxazepam       | N05BA04                                                                                                             | 604-75-1    | 88.1 ± 1.2   | 97.5 ± 0.5   | 37.6 ± 4.7   | 44.6 ± 6.5   |
| Pantoprazole   | A02BC02                                                                                                             | 102625-70-7 | 97.1 ± 1.4   | 98.9 ± 0.6   | 108.9 ± 4.0  | 101.7 ± 4.4  |
| Paroxetine     | N06AB05                                                                                                             | 110429-35-1 | 80.6 ± 3.1   | 99.6 ± 1.9   | 15.5 ± 3.8   | 87.2 ± 3.6   |
| Perazine       | N05AB10                                                                                                             | 84-97-9     | 53.6 ± 3.6   | 92.0 ± 1.8   | 58.5 ± 2.8   | 65.9 ± 2.0   |
| Pipamperone    | N05AD05                                                                                                             | 2448-68-2   | 33.9 ± 6.0   | 78.1 ± 2.2   | 12.0 ± 4.5   | 33.1 ± 3.4   |
| Piracetam      | N06BX03                                                                                                             | 7491-74-9   | 3.4 ± 3.4    | 2.5 ± 1.7    | -9.5 ± 12.1  | -0.5 ± 10.0  |
| Pravastatin    | C10AA03                                                                                                             | 81093-37-0  | -26.3 ± 11.1 | -11.1 ± 11.1 | -30.2 ± 5.5  | -15.0 ± 5.2  |
| Prednisolone   | A07EA01,<br>C05AA04,<br>D07AA03,<br>D07XA02,<br>H02AB06,<br>R01AD02,<br>S01BA04,<br>S01CB02,<br>S02BA03,<br>S03BA02 | 50-24-8     | 66.0 ± 2.5   | 91.5 ± 0.5   | 42.1 ± 4.4   | 68.6 ± 2.8   |
| Pregabalin     | N03AX16                                                                                                             | 148553-50-8 | -1.3 ± 9.0   | 27.2 ± 5.9   | -29.6 ± 7.5  | -15.8 ± 5.2  |
| Promethazine   | D04AA10,<br>R06AD02                                                                                                 | 58-33-3     | 83.7 ± 3.3   | 100.7 ± 1.3  | 5.7 ± 3.8    | 76.0 ± 3.0   |

|                     |                                    |             |                  |                  |                  |                  |
|---------------------|------------------------------------|-------------|------------------|------------------|------------------|------------------|
| Quetiapine          | N05AH04                            | 111974-72-2 | $23.7 \pm 5.9$   | $86.8 \pm 2.8$   | $15.8 \pm 9.1$   | $58.3 \pm 4.5$   |
| Ramipril            | C09AA05                            | 87333-19-5  | $12.9 \pm 4.1$   | $35.4 \pm 2.9$   | $72.5 \pm 7.4$   | $83.6 \pm 6.2$   |
| Ranitidine          | A02BA02                            | 66357-35-5  | $65.2 \pm 7.7$   | $91.5 \pm 3.8$   | $-7.9 \pm 12.9$  | $11.6 \pm 3.4$   |
| Reboxetine          | N06AX18                            | 98769-84-7  | $64.8 \pm 4.0$   | $95.6 \pm 1.4$   | $-21.6 \pm 8.3$  | $15.4 \pm 8.0$   |
| Risperidone         | N05AX08                            | 106266-06-2 | $81.0 \pm 4.4$   | $98.3 \pm 3.1$   | $57.8 \pm 5.2$   | $78.4 \pm 1.5$   |
| Rivastigmine        | N06DA03                            | 123441-03-2 | $51.8 \pm 4.0$   | $91.4 \pm 1.5$   | $25.1 \pm 9.1$   | $59.4 \pm 4.6$   |
| Sertraline          | N06AB06                            | 79559-97-0  | $88.4 \pm 2.1$   | $100.5 \pm 0.7$  | $43.6 \pm 2.9$   | $96.1 \pm 1.7$   |
| Simvastatin lactone | C10AA01, C10BA02                   | 79902-63-9  | $-15.4 \pm 5.5$  | $57.6 \pm 10.0$  | $48.5 \pm 9.0$   | $53.8 \pm 13.1$  |
| Sitagliptin         | A10BH01                            | 486460-32-6 | $85.9 \pm 1.1$   | $97.5 \pm 0.1$   | $-8.2 \pm 7.8$   | $22.7 \pm 6.0$   |
| Spironolactone      | C03DA01                            | 52-01-7     | $96.8 \pm 0.5$   | $98.4 \pm 1.0$   | $33.5 \pm 4.7$   | $95.0 \pm 0.5$   |
| Tamsulosin          | G04CA02                            | 106133-20-4 | $87.9 \pm 0.9$   | $107.0 \pm 3.1$  | $14.9 \pm 4.8$   | $65.7 \pm 2.9$   |
| Telmisartan         | C09CA07                            | 144701-48-4 | $95.1 \pm 0.7$   | $99.2 \pm 0.2$   | $87.1 \pm 2.1$   | $93.3 \pm 2.8$   |
| Theophylline        | R03DA04, R03DA54, R03DB04, R03DA74 | 58-55-9     | $-21.5 \pm 13.0$ | $-36.6 \pm 10.9$ | $-12.9 \pm 5.7$  | $-16.7 \pm 6.8$  |
| Torasemide          | C03CA04                            | 56211-40-6  | $-33.2 \pm 5.0$  | $-19.5 \pm 0.8$  | $-11.4 \pm 2.3$  | $-40.3 \pm 5.0$  |
| Tramadol            | N02AX02                            | 36282-47-0  | $47.1 \pm 9.5$   | $103.7 \pm 9.2$  | $5.9 \pm 7.9$    | $31.4 \pm 1.4$   |
| Tranlycypromine     | N06AF04                            | 13492-01-8  | $39.0 \pm 3.3$   | $79.1 \pm 2.9$   | $27.8 \pm 5.6$   | $54.7 \pm 3.1$   |
| Triamterene         | C03DB02                            | 396-01-0    | $48.0 \pm 5.1$   | $92.0 \pm 2.1$   | $6.6 \pm 11.2$   | $17.5 \pm 3.8$   |
| Trimipramine        | N06AA06                            | 521-78-8    | $99.9 \pm 0.5$   | $100.0 \pm 0.8$  | $51.0 \pm 10.2$  | $98.6 \pm 1.2$   |
| Trospium chloride   | G04BD09                            | 10405-02-4  | $99.3 \pm 0.1$   | $98.8 \pm 0.4$   | $83.2 \pm 2.2$   | $96.7 \pm 0.7$   |
| Valproic acid       | N03AG01                            | 1069-66-5   | $18.5 \pm 7.6$   | $27.7 \pm 1.9$   | $-17.3 \pm 9.5$  | $-29.0 \pm 9.2$  |
| Valsartan           | C09CA03, C09DB01, C09DA03          | 137862-53-4 | $-41.7 \pm 1.8$  | $-12.9 \pm 3.6$  | $-77.2 \pm 6.0$  | $-82.1 \pm 9.9$  |
| Venlafaxine         | N06AX16                            | 99300-78-4  | $17.6 \pm 3.2$   | $72.2 \pm 2.5$   | $-43.3 \pm 13.0$ | $-54.3 \pm 13.1$ |
| Verapamil           | C08DA01                            | 52-53-9     | $84.8 \pm 2.8$   | $100.2 \pm 1.5$  | $29.4 \pm 7.0$   | $79.1 \pm 2.3$   |
| Xipamide            | C03BA10                            | 14293-44-8  | $-22.3 \pm 9.7$  | $9.4 \pm 9.2$    | $10.5 \pm 3.7$   | $6.6 \pm 9.3$    |
| Zolpidem            | N05CF02                            | 82626-48-0  | $96.7 \pm 0.3$   | $99.1 \pm 0.5$   | $36.5 \pm 4.3$   | $90.7 \pm 8.2$   |
